# Supplementary material for: Effects of a health education intervention on hypertension-related knowledge, prevention and self-care practices in Nigerian retirees: a quasi-experimental study
Source: Arch Public Health. 2019 May 23;77:23. doi: 10.1186/s13690-019-0349-x (PMC6532220; doi:10.1186/s13690-019-0349-x)
Supplement: Supplementary file 11 — Results of one-way repeated measures ANOVA for substance use T1-T3. (XLS 39 kb) [file 13690_2019_349_MOESM11_ESM.xls]

## Sheet: Sheet1
GLM SubsUseT1 SubsUseT2 SubsUseT3 BY Group
/WSFACTOR=Time 3 Polynomial
/METHOD=SSTYPE(3)
/EMMEANS=TABLES(Time) COMPARE ADJ(BONFERRONI)
/EMMEANS=TABLES(Group*Time)
/PRINT=DESCRIPTIVE ETASQ
/CRITERIA=ALPHA(.05)
/WSDESIGN=Time
/DESIGN=Group.
General Linear Model
Notes
Output Created		2018-12-13 13:10:15
Comments
Input	Data	C:\Users\Dr Agbaje Samson\Ozoemena, Iweama 2018 - Treatment Group & Control Group.sav
	Active Dataset	DataSet1
	Filter	<none>
	Weight	<none>
	Split File	<none>
	N of Rows in Working Data File	392
Missing Value Handling	Definition of Missing	User-defined missing values are treated as missing.
	Cases Used	Statistics are based on all cases with valid data for all variables in the model.
Syntax		GLM SubsUseT1 SubsUseT2 SubsUseT3 BY Group /WSFACTOR=Time 3 Polynomial /METHOD=SSTYPE(3) /EMMEANS=TABLES(Time) COMPARE ADJ(BONFERRONI) /EMMEANS=TABLES(Group*Time) /PRINT=DESCRIPTIVE ETASQ /CRITERIA=ALPHA(.05) /WSDESIGN=Time /DESIGN=Group.
Resources	Processor Time	00:00:00.06
	Elapsed Time	00:00:00.07
[DataSet1] C:\Users\Dr Agbaje, Ozoemena & Iweama 2018 - T-Group & C-Group.sav
Within-Subjects Factors
Measure: MEASURE_1
Time	Dependent Variable
1	SubsUseT1
2	SubsUseT2
3	SubsUseT3
Between-Subjects Factors
		Value Label	N
Group	0	C-Group	195
	1	T-Group	197
Descriptive Statistics
Group		Mean	Std. Deviation	N
SubsUseT1	C-Group	2.15385	0.829186	195
	T-Group	2.28934	0.916147	197
	Total	2.22194	0.875485	392
SubsUseT2	C-Group	2.09744	0.93926	195
	T-Group	1.6802	1.02233	197
	Total	1.88776	1.00263	392
SubsUseT3	C-Group	2.06154	0.950479	195
	T-Group	1.20305	0.984259	197
	Total	1.6301	1.05763	392
Multivariate Testsa
Effect		Value	F	Hypothesis df	Error df	Sig.	Partial Eta Squared
Time	Pillai's Trace	0.21309	52.669b	2	389	5.72068e-21	0.21309
	Wilks' Lambda	0.78691	52.669b	2	389	5.72068e-21	0.21309
	Hotelling's Trace	0.270793	52.669b	2	389	5.72068e-21	0.21309
	Roy's Largest Root	0.270793	52.669b	2	389	5.72068e-21	0.21309
Time * Group	Pillai's Trace	0.163238	37.944b	2	389	8.83298e-16	0.163238
	Wilks' Lambda	0.836762	37.944b	2	389	8.83298e-16	0.163238
	Hotelling's Trace	0.195083	37.944b	2	389	8.83298e-16	0.163238
	Roy's Largest Root	0.195083	37.944b	2	389	8.83298e-16	0.163238
a. Design: Intercept + Group Within Subjects Design: Time
b. Exact statistic
Mauchly's Test of Sphericitya
Measure: MEASURE_1
Within Subjects Effect	Mauchly's W	Approx. Chi-Square	df	Sig.	Epsilonb
					Greenhouse-Geisser	Huynh-Feldt	Lower-bound
Time	0.658605	162.459	2	5.27859e-36	0.745492	0.749617	0.5
Tests the null hypothesis that the error covariance matrix of the orthonormalized transformed dependent variables is proportional to an identity matrix.
a. Design: Intercept + Group Within Subjects Design: Time
b. May be used to adjust the degrees of freedom for the averaged tests of significance. Corrected tests are displayed in the Tests of Within-Subjects Effects table.
Tests of Within-Subjects Effects
Measure: MEASURE_1
Source		Type III Sum of Squares	df	Mean Square	F	Sig.	Partial Eta Squared
Time	Sphericity Assumed	68.4441	2	34.222	56.7517	9.75792e-24	0.127032
	Greenhouse-Geisser	68.4441	1.49098	45.9053	56.7517	2.25798e-18	0.127032
	Huynh-Feldt	68.4441	1.49923	45.6527	56.7517	1.84793e-18	0.127032
	Lower-bound	68.4441	1	68.4441	56.7517	3.47972e-13	0.127032
Time * Group	Sphericity Assumed	48.6141	2	24.3071	40.3094	2.19121e-17	0.0936753
	Greenhouse-Geisser	48.6141	1.49098	32.6054	40.3094	1.32207e-13	0.0936753
	Huynh-Feldt	48.6141	1.49923	32.426	40.3094	1.14787e-13	0.0936753
	Lower-bound	48.6141	1	48.6141	40.3094	6.03295e-10	0.0936753
Error(Time)	Sphericity Assumed	470.35	780	0.603013
	Greenhouse-Geisser	470.35	581.484	0.808879
	Huynh-Feldt	470.35	584.701	0.804428
	Lower-bound	470.35	390	1.20603
Tests of Within-Subjects Contrasts
Measure: MEASURE_1
Source		Type III Sum of Squares	df	Mean Square	F	Sig.	Partial Eta Squared
Time	Linear	68.0643	1	68.0643	85.647	1.44737e-18	0.180064
	Quadratic	0.379805	1	0.379805	0.923383	0.337184	0.00236206
Time * Group	Linear	48.4112	1	48.4112	60.9171	5.53008e-14	0.135096
	Quadratic	0.202934	1	0.202934	0.493374	0.482845	0.00126346
Error(Time)	Linear	309.936	390	0.794707
	Quadratic	160.414	390	0.411319
Tests of Between-Subjects Effects
Measure: MEASURE_1 Transformed Variable: Average
Source	Type III Sum of Squares	df	Mean Square	F	Sig.	Partial Eta Squared
Intercept	4309.1	1	4309.1	2955.16	4.25867e-184	0.883414
Group	42.4698	1	42.4698	29.1255	1.18009e-07	0.0694912
Error	568.683	390	1.45816
Estimated Marginal Means
1. Time
Estimates
Measure: MEASURE_1
Time	Mean	Std. Error	95% Confidence Interval
			Lower Bound	Upper Bound
1	2.22159	0.0441428	2.13481	2.30838
2	1.88882	0.0495935	1.79132	1.98632
3	1.63229	0.048872	1.53621	1.72838
Pairwise Comparisons
Measure: MEASURE_1
(I) Time		Mean Difference (I-J)	Std. Error	Sig.b	95% Confidence Interval for Differenceb
					Lower Bound	Upper Bound
1	2	.333*	0.0624011	4.92482e-07	0.18274	0.482808
	3	.589*	0.0636768	4.3421e-18	0.4362	0.742402
2	1	-.333*	0.0624011	4.92482e-07	-0.482808	-0.18274
	3	.257*	0.0357967	1.16485e-11	0.17046	0.342595
3	1	-.589*	0.0636768	4.3421e-18	-0.742402	-0.4362
	2	-.257*	0.0357967	1.16485e-11	-0.342595	-0.17046
Based on estimated marginal means
*. The mean difference is significant at the .05 level.
b. Adjustment for multiple comparisons: Bonferroni.
Multivariate Tests
	Value	F	Hypothesis df	Error df	Sig.	Partial Eta Squared
Pillai's trace	0.21309	52.669a	2	389	5.72068e-21	0.21309
Wilks' lambda	0.78691	52.669a	2	389	5.72068e-21	0.21309
Hotelling's trace	0.270793	52.669a	2	389	5.72068e-21	0.21309
Roy's largest root	0.270793	52.669a	2	389	5.72068e-21	0.21309
Each F tests the multivariate effect of Time. These tests are based on the linearly independent pairwise comparisons among the estimated marginal means.
a. Exact statistic
2. Type of Group * Time
Measure: MEASURE_1
Type of Group		Mean	Std. Error	95% Confidence Interval
				Lower Bound	Upper Bound
C-Group	1	2.15385	0.0625864	2.0308	2.2769
	2	2.09744	0.0703145	1.95919	2.23568
	3	2.06154	0.0692915	1.92531	2.19777
T-Group	1	2.28934	0.0622679	2.16692	2.41176
	2	1.6802	0.0699567	1.54266	1.81774
	3	1.20305	0.0689389	1.06751	1.33858
